# Supplementary material for: Predicting the soil water characteristic curve from the particle size distribution based on a pore space geometry containing slit-shaped spaces
Source: Copernicus journal article supplement (doi:10.5194/hess-2017-668), 2017-12-05
Supplement: Supplementary file 1 [file Excel S1.xlsx]

## Sheet: Sheet1
basic soil physical properties			Note:The blue highlights denoted the manual input data in every prediction.
			The β in red highlight is a solution when making the SA which obtained using two methods are equal(highlights in green).
UNSODA code	measured PSD
1360	particle diameter(μm)	cumulative fraction		bulk density	particle density	porosity	θs
	2	0.435		1.5	2.7	0.444	0.449
	6	0.509
	20	0.678
	63	0.873
	200	0.974
	630	0.995
	2000	1
step 1	fitting PSD using a modified logistic growth model
	PSD
	particle diameter(μm)	a	b	c	cumulative mass fraction	mass fraction
	2	2.08393	0.32037	0.50854	0.430823	0.430823
	5	2.08393	0.32037	0.50854	0.498007	0.0671839
	10	2.08393	0.32037	0.50854	0.574189	0.0761818
	15	2.08393	0.32037	0.50854	0.630779	0.0565906
	20	2.08393	0.32037	0.50854	0.676035	0.0452558
	30	2.08393	0.32037	0.50854	0.745015	0.0689798
	40	2.08393	0.32037	0.50854	0.795237	0.0502225
	50	2.08393	0.32037	0.50854	0.833142	0.0379049
	60	2.08393	0.32037	0.50854	0.86243	0.0292881
	70	2.08393	0.32037	0.50854	0.885461	0.0230302
	80	2.08393	0.32037	0.50854	0.903827	0.0183661
	90	2.08393	0.32037	0.50854	0.918647	0.0148207
	100	2.08393	0.32037	0.50854	0.93073	0.0120822
	200	2.08393	0.32037	0.50854	0.982123	0.0513929
	500	2.08393	0.32037	0.50854	0.998909	0.0167869
	1000	2.08393	0.32037	0.50854	0.999955	0.0010458
	2000	2.08393	0.32037	0.50854	1	4.43622e-05
	code	Clay （%）	Silt （%）	Sand （%）
	1360	0.430823	0.402319	0.166858
	Estimated SA
	fc	fsi	fsa	fcln0.001	fsiln0.026	fsaln1.025	dg				SA
	0.430823	0.402319	0.166858	-297.602	-146.833	0.412015	0.0117932				216.332
step 2	determining the α values according to the sand content of sample, then estimate SA and obtain the β
	particle diameter(μm)	pore diameter(μm)	pore diameter(m)	α	slit width (m)	slit width (μm)	porosity	β	SAi(m3/m3)	mass fraction	bulk density(kg/m3)	SAi (m2/g)	SA(m2/g)
	2	0.6	6e-07	0.001	6e-10	0.0006	0.444	308.6	6.53102e+08	0.430823	1500	435.401	187.581
	5	1.5	1.5e-06	0.001	1.5e-09	0.0015	0.444	308.6	2.61241e+08	0.0671839	1500	174.161	11.7008
	10	3	3e-06	0.001	3e-09	0.003	0.444	308.6	1.3062e+08	0.0761818	1500	87.0803	6.63394
	15	4.5	4.5e-06	0.001	4.5e-09	0.0045	0.444	308.6	8.70803e+07	0.0565906	1500	58.0535	3.28528
	20	6	6e-06	0.001	6e-09	0.006	0.444	308.6	6.53102e+07	0.0452558	1500	43.5401	1.97044
	30	9	9e-06	0.001	9e-09	0.009	0.444	308.6	4.35401e+07	0.0689798	1500	29.0268	2.00226
	40	12	1.2e-05	0.001	1.2e-08	0.012	0.444	308.6	3.26551e+07	0.0502225	1500	21.7701	1.09335
	50	15	1.5e-05	0.001	1.5e-08	0.015	0.444	308.6	2.61241e+07	0.0379049	1500	17.4161	0.660154
	60	18	1.8e-05	0.001	1.8e-08	0.018	0.444	308.6	2.17701e+07	0.0292881	1500	14.5134	0.425069
	70	21	2.1e-05	0.001	2.1e-08	0.021	0.444	308.6	1.86601e+07	0.0230302	1500	12.44	0.286496
	80	24	2.4e-05	0.001	2.4e-08	0.024	0.444	308.6	1.63275e+07	0.0183661	1500	10.885	0.199916
	90	27	2.7e-05	0.001	2.7e-08	0.027	0.444	308.6	1.45134e+07	0.0148207	1500	9.67558	0.143399
	100	30	3e-05	0.001	3e-08	0.03	0.444	308.6	1.3062e+07	0.0120822	1500	8.70803	0.105212
	200	60	6e-05	0.001	6e-08	0.06	0.444	308.6	6.53102e+06	0.0513929	1500	4.35401	0.223766
	500	150	0.00015	0.001	1.5e-07	0.15	0.444	308.6	2.61241e+06	0.0167869	1500	1.74161	0.0292361
	1000	300	0.0003	0.0004	1.2e-07	0.12	0.444	308.6	1.77497e+06	0.0010458	1500	1.18332	0.00123751
	2000	600	0.0006	0.0004	2.4e-07	0.24	0.444	308.6	887487	4.43622e-05	1500	0.591658	2.62473e-05
												total SA	216.341
step 3	the prediction of SWC
	imput the α and β obtained in step 2 into the prediction procedure of SWC below
	particle diameter(μm)	pore diameter(μm)	pore diameter(m)	α	狭缝直径	狭缝直径um	β	slit	central pore	slit pore volume fraction ζi	mass fraction		pore volume fraction	cumulative pore fraction	θs	θi	suction head (cmH2O)
	2	0.6	6e-07	0.001	6e-10	0.0006	308.6	2.22192e-13	2.826e-13	0.440165	0.430823		0.681136	0.681136	0.449	0.30583	5000
	5	1.5	1.5e-06	0.001	1.5e-09	0.0015	308.6	1.3887e-12	1.76625e-12	0.440165	0.0671839	0.029572	0.0376119	0.718748	0.449	0.322718	2000
	10	3	3e-06	0.001	3e-09	0.003	308.6	5.5548e-12	7.065e-12	0.440165	0.0761818	0.0335326	0.0426492	0.761397	0.449	0.341867	1000
	15	4.5	4.5e-06	0.001	4.5e-09	0.0045	308.6	1.24983e-11	1.58963e-11	0.440165	0.0565906	0.0249092	0.0316814	0.793078	0.449	0.356092	666.667
	20	6	6e-06	0.001	6e-09	0.006	308.6	2.22192e-11	2.826e-11	0.440165	0.0452558	0.01992	0.0253357	0.818414	0.449	0.367468	500
	30	9	9e-06	0.001	9e-09	0.009	308.6	4.99932e-11	6.3585e-11	0.440165	0.0689798	0.0303625	0.0386173	0.857031	0.449	0.384807	333.333
	40	12	1.2e-05	0.001	1.2e-08	0.012	308.6	8.88768e-11	1.1304e-10	0.440165	0.0502225	0.0221062	0.0281163	0.885148	0.449	0.397431	250
	50	15	1.5e-05	0.001	1.5e-08	0.015	308.6	1.3887e-10	1.76625e-10	0.440165	0.0379049	0.0166844	0.0212205	0.906368	0.449	0.406959	200
	60	18	1.8e-05	0.001	1.8e-08	0.018	308.6	1.99973e-10	2.5434e-10	0.440165	0.0292881	0.0128916	0.0163965	0.922765	0.449	0.414321	166.667
	70	21	2.1e-05	0.001	2.1e-08	0.021	308.6	2.72185e-10	3.46185e-10	0.440165	0.0230302	0.0101371	0.0128931	0.935658	0.449	0.42011	142.857
	80	24	2.4e-05	0.001	2.4e-08	0.024	308.6	3.55507e-10	4.5216e-10	0.440165	0.0183661	0.00808413	0.010282	0.94594	0.449	0.424727	125
	90	27	2.7e-05	0.001	2.7e-08	0.027	308.6	4.49939e-10	5.72265e-10	0.440165	0.0148207	0.00652356	0.00829714	0.954237	0.449	0.428452	111.111
	100	30	3e-05	0.001	3e-08	0.03	308.6	5.5548e-10	7.065e-10	0.440165	0.0120822	0.00531815	0.00676401	0.961001	0.449	0.431489	100
	200	60	6e-05	0.001	6e-08	0.06	308.6	2.22192e-09	2.826e-09	0.440165	0.0513929	0.0226214	0.0287715	0.989772	0.449	0.444408	50
	500	150	0.00015	0.001	1.5e-07	0.15	308.6	1.3887e-08	1.76625e-08	0.440165	0.0167869	0.007389	0.00939786	0.99917	0.449	0.448627	20
	1000	300	0.0003	0.0004	1.2e-07	0.12	308.6	2.22192e-08	7.065e-08	0.239253	0.0010458	0.00025021	0.000795587	0.999966	0.449	0.448985	10
	2000	600	0.0006	0.0004	2.4e-07	0.24	308.6	8.88768e-08	2.826e-07	0.239253	4.43622e-05	1.06138e-05	3.37485e-05	1	0.449	0.449	5
												0.250313
step 4	Model validations
	measured SWC
	drying	suction head (cmH2O)	θ(cm3/cm3)
		5	0.449
		10	0.449
		50	0.436
		100	0.432
		200	0.426
		316	0.411
		631	0.382
		1000	0.365
		2000	0.34
		6310	0.31
		15850	0.278
traditional method
ψ(cm)=3000/d(um)
d=0.3D(颗粒直径)
编号	particle diameter(μm)	cumulative mass fraction	θs	θi	pore diameter(μm)	suction head (cmH2O)
	2	0.430823	0.449	0.19344	0.6	5000
	5	0.498007	0.449	0.223605	1.5	2000
	10	0.574189	0.449	0.257811	3	1000
	15	0.630779	0.449	0.28322	4.5	666.667
	20	0.676035	0.449	0.30354	6	500
	30	0.745015	0.449	0.334512	9	333.333
	40	0.795237	0.449	0.357062	12	250
	50	0.833142	0.449	0.374081	15	200
	60	0.86243	0.449	0.387231	18	166.667
	70	0.885461	0.449	0.397572	21	142.857
	80	0.903827	0.449	0.405818	24	125
	90	0.918647	0.449	0.412473	27	111.111
	100	0.93073	0.449	0.417898	30	100
	200	0.982123	0.449	0.440973	60	50
	500	0.998909	0.449	0.44851	150	20
	1000	0.999955	0.449	0.44898	300	10
	2000	1	0.449	0.449	600	5
